# Supplementary material for: A high-throughput method to detect RNA profiling by integration of RT-MLPA with next generation sequencing technology
Source: PubMed Central journal article supplement (PMC5542250; doi:10.18632/oncotarget.17551), 2017-05-02
Supplement: oncotarget-08-46071-s001.pdf [file oncotarget-08-46071-s001.pdf]

# A high-throughput method to detect RNA profiling by integration of RT-MLPA with next generation sequencing technology

## SUPPLEMENTARY MATERIALS

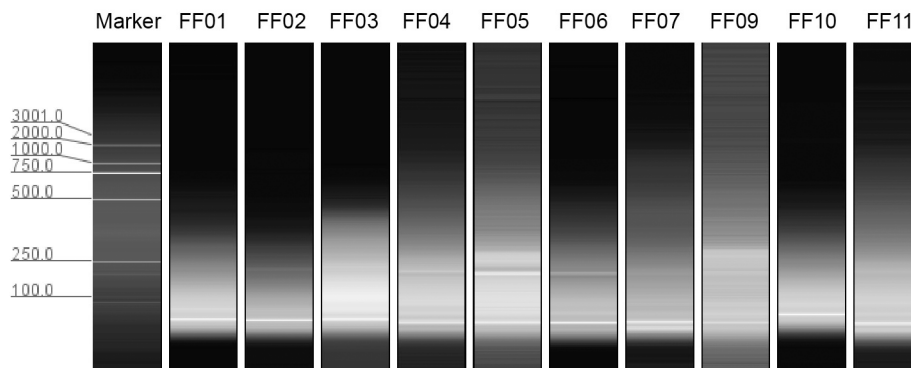

Supplementary Figure 1: FFPE RNA length distribution.

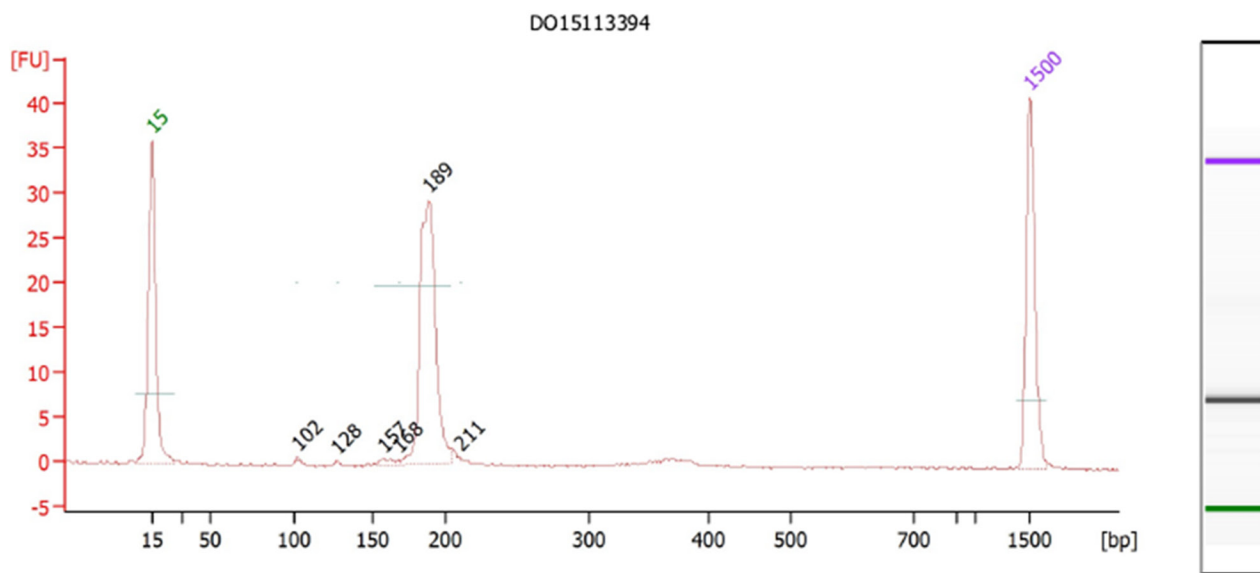

Supplementary Figure 2: Length analysis of RT-MLPSeq libraries from FFPE RNAs.

**Supplementary Table 1: The gene symbols involved 21-gene test**

|                     |                                     |
|---------------------|-------------------------------------|
| Proliferation group | Ki67, STK15, Survivin, CCNB1, MYBL2 |
| HER2 group          | GRB7, HER2                          |
| Invasion group      | MMP11, CTSL2                        |
| Estrogen group      | ER, PGR, BCL2, SCUBE2               |
| Reference group     | ACTB, GAPDH, RPLPO, GUSB, TFRC      |
| Others              | GSTM1, CD68, BAG1                   |

**Supplementary Table 2. The sequences of RT-MLPSeq probes for the 21gene assay**

See Supplementary File 1
